# Supplementary material for: CXCR4/CXCL12 Signaling and Protumor Macrophages in Primary Tumors and Sentinel Lymph Nodes Are Involved in Luminal B Breast Cancer Progression
Source: Hindawi journal article supplement (doi:10.1155/2018/5018671), 2018-01-01
Supplement: f1 [file 5018671.f1.pdf]

**Supplementary Table 1:** Clinical and pathological features of patients enclosed in the discovery cohort (*n* = 40)

| Case Number | Larger lesion size (mm) | CK19 copies | ER (%) | PgR (%) | Ki67 (%) | HER2 | Site of relapse   |
|-------------|-------------------------|-------------|--------|---------|----------|------|-------------------|
| 1           | 25                      | 970000      | 90     | 80      | 30       | -    | LN, Bone          |
| 2           | 22                      | 32000       | 95     | 50      | 50       | -    | Liver, Bone, Lung |
| 3           | 46                      | 15300       | 95     | 3       | 30       | -    | Breast, Bone      |
| 4           | 29                      | 6800000     | 95     | 0       | 60       | -    | Bone, Liver       |
| 5           | 17                      | 1400000     | 85     | 90      | 35       | -    | Breast            |
| 6           | 35                      | 85000       | 100    | 100     | 20       | -    | Bone, Lung        |
| 7           | 18                      | 45000       | 100    | 20      | 40       | -    | Liver, Bone       |
| 8           | 23                      | 3060000     | 90     | 80      | 40       | -    | Liver, Bone       |
| 9           | 13                      | 4050000     | 100    | 10      | 30       | -    | Lung, Pleura      |
| 10          | 17                      | 4250000     | 95     | 0       | 20       | -    | Brain             |
| 11          | 12                      | 65000       | 100    | 100     | 20       | -    | Bone              |
| 12          | 40                      | 3700000     | 100    | 90      | 20       | -    | Liver             |
| 13          | 50                      | 4900000     | 100    | 5       | 20       | -    | Bone              |
| 14          | 14                      | 650000      | 100    | 80      | 15       | -    | Lung              |
| 15          | 9                       | 3700000     | 80     | 80      | 20       | -    | Lung              |
| 16          | 20                      | 290000      | 95     | 50      | 50       | -    | Liver             |
| 17          | 22                      | 350000      | 80     | 80      | 60       | -    | Bone, Liver       |
| 18          | 46                      | 176400      | 85     | 50      | 80       | -    | Lung              |
| 19          | 29                      | 2400000     | 95     | 10      | 60       | -    | Breast            |
| 20          | 55                      | 4000000     | 95     | 90      | 35       | -    | Liver             |
| 21          | 18                      | 75000       | 100    | 80      | 50       | -    | -                 |
| 22          | 19                      | 240000      | 90     | 20      | 35       | -    | -                 |
| 23          | 18                      | 130000      | 100    | 40      | 30       | -    | -                 |
| 24          | 17                      | 220000      | 85     | 3       | 20       | -    | -                 |
| 25          | 26                      | 190000      | 95     | 60      | 60       | -    | -                 |
| 26          | 18                      | 13000       | 90     | 60      | 65       | -    | -                 |
| 27          | 30                      | 34000       | 95     | 95      | 30       | -    | -                 |
| 28          | 46                      | 5600        | 95     | 5       | 50       | -    | -                 |
| 29          | 22                      | 93500       | 95     | 2       | 10       | -    | -                 |
| 30          | 15                      | 17400       | 98     | 98      | 25       | -    | -                 |
| 31          | 18                      | 390000      | 95     | 0       | 50       | -    | -                 |
| 32          | 26                      | 290000      | 95     | 30      | 40       | -    | -                 |
| 33          | 16                      | 5100000     | 90     | 7       | 25       | -    | -                 |
| 34          | 16                      | 100000      | 90     | 80      | 33       | -    | -                 |
| 35          | 16                      | 21400       | 90     | 90      | 24       | -    | -                 |
| 36          | 16                      | 12000       | 90     | 85      | 38       | -    | -                 |
| 37          | 26                      | 41000       | 90     | 80      | 35       | -    | -                 |
| 38          | 26                      | 13000       | 70     | 7       | 35       | -    | -                 |
| 39          | 16                      | 72000       | 90     | 90      | 22       | -    | -                 |
| 40          | 12                      | 290000      | 90     | 85      | 25       | -    | -                 |

*CK19* cytokeratin 19, *ER* estrogen receptor, *PgR* progesterone receptor, *HER2* human epidermal growth factor receptor 2, *LN* lymph node

**Supplementary Table 2:** Clinical and pathological features of patients enclosed in the validation cohort ( $n = 150$ )

| Case Number | Tumor size (mm) | Grade | LVI | ER (%) | PgR (%) | Ki67 (%) | HER2 | Site of relapse |
|-------------|-----------------|-------|-----|--------|---------|----------|------|-----------------|
| 1           | -               | 3     | No  | 70     | 0       | 20       | -    | Lung            |
| 2           | -               | 2     | Yes | 90     | 60      | 20       | -    | Bone            |
| 3           | 6               | 2     | Yes | 90     | 20      | 45       | -    | Bone            |
| 4           | 23              | 3     | Yes | 100    | 70      | 20       | -    | LN              |
| 5           | 28              | 3     | No  | 90     | 90      | 30       | -    | Liver           |
| 6           | -               | 3     | Yes | 70     | 0       | 40       | -    | LN              |
| 7           | 23              | 3     | Yes | 90     | 80      | 40       | -    | LN              |
| 8           | 6               | 3     | Yes | 90     | 0       | 20       | -    | LN, Bone        |
| 9           | -               | 2     | Yes | 90     | 3       | 25       | -    | Lung            |
| 10          | -               | 2     | -   | 90     | 35      | 30       | -    | LN              |
| 11          | -               | 2     | Yes | 90     | 80      | 40       | -    | LN, Bone        |
| 12          | -               | 2     | Yes | 95     | 90      | 20       | -    | LN              |
| 13          | -               | 3     | Yes | 95     | 40      | 30       | -    | LN, Skin        |
| 14          | -               | 2     | Yes | 95     | 90      | 20       | -    | LN, Bone        |
| 15          | 13              | 2     | No  | 95     | 20      | 25       | -    | Bone            |
| 16          | -               | 2     | No  | 90     | 60      | 20       | -    | Skin            |
| 17          | -               | 3     | Yes | 60     | 0       | 20       | -    | Bone, Brain     |
| 18          | -               | 3     | No  | 90     | 30      | 30       | -    | Liver, LN       |
| 19          | -               | 3     | Yes | 95     | 95      | 20       | -    | Lung, LN        |
| 20          | 22              | 3     | Yes | 90     | 90      | 30       | -    | Liver, Bone     |
| 21          | -               | 3     | Yes | 90     | 90      | 20       | -    | Lung            |
| 22          | 13              | 3     | -   | 95     | 75      | 30       | -    | Bone            |
| 23          | -               | 3     | Yes | 95     | 40      | 30       | -    | Bone, Lung      |
| 24          | 14              | 2     | -   | 90     | 90      | 20       | -    | Bone            |
| 25          | -               | -     | No  | 70     | 5       | 25       | -    | Bone, Liver     |
| 26          | 31              | 3     | No  | 60     | 60      | 20       | -    | Bone            |
| 27          | 22              | 2     | No  | 100    | 80      | 20       | -    | LN              |
| 28          | 22              | 3     | -   | 90     | 95      | 20       | -    | -               |
| 29          | 13              | 3     | Yes | 95     | 95      | 25       | -    | -               |
| 30          | -               | 3     | No  | 90     | 50      | 20       | -    | -               |
| 31          | -               | 3     | No  | 70     | 90      | 30       | -    | -               |
| 32          | 4               | 2     | Yes | 20     | 80      | 30       | -    | -               |
| 33          | -               | 2     | Yes | 90     | 50      | 20       | -    | -               |
| 34          | -               | 2     | No  | 70     | 90      | 20       | -    | -               |
| 35          | -               | 2     | Yes | 40     | 65      | 45       | -    | -               |
| 36          | -               | 2     | No  | 100    | 50      | 20       | -    | -               |
| 37          | -               | 2     | No  | 90     | 90      | 30       | -    | -               |
| 38          | -               | 3     | Yes | 95     | 80      | 20       | -    | -               |
| 39          | -               | 3     | Yes | 20     | 1       | 20       | -    | -               |
| 40          | -               | 2     | Yes | 90     | 80      | 40       | -    | -               |
| 41          | 11              | 3     | No  | 90     | 30      | 60       | -    | -               |
| 42          | -               | 2     | No  | 95     | 95      | 20       | -    | -               |
| 43          | -               | 3     | No  | 95     | 30      | 20       | -    | -               |
| 44          | -               | 3     | -   | 10     | 0       | 20       | -    | -               |
| 45          | 28              | 2     | Yes | 50     | 0       | 30       | -    | -               |
| 46          | -               | 2     | No  | 70     | 30      | 20       | -    | -               |
| 47          | -               | 3     | -   | 90     | 15      | 20       | -    | -               |
| 48          | 28              | 3     | Yes | 95     | 95      | 25       | -    | -               |
| 49          | -               | 3     | No  | 90     | 55      | 30       | -    | -               |
| 50          | -               | 3     | Yes | 45     | 20      | 50       | -    | -               |

|     |    |   |     |     |    |    |   |   |
|-----|----|---|-----|-----|----|----|---|---|
| 51  | 18 | 3 | No  | 95  | 80 | 25 | - | - |
| 52  | -  | 2 | -   | 95  | 15 | 25 | - | - |
| 53  | 25 | 3 | Yes | 90  | 70 | 40 | - | - |
| 54  | -  | 3 | Yes | 95  | 95 | 40 | - | - |
| 55  | -  | 2 | No  | 95  | 95 | 20 | - | - |
| 56  | 27 | 2 | Yes | 90  | 30 | 30 | - | - |
| 57  | -  | 2 | No  | 95  | 90 | 20 | - | - |
| 58  | 25 | 3 | -   | 70  | 80 | 25 | - | - |
| 59  | -  | 2 | No  | 90  | 70 | 30 | - | - |
| 60  | -  | 3 | No  | 90  | 70 | 25 | - | - |
| 61  | -  | 3 | Yes | 95  | 90 | 30 | - | - |
| 62  | 11 | 2 | No  | 80  | 80 | 25 | - | - |
| 63  | -  | 2 | No  | 95  | 0  | 40 | - | - |
| 64  | -  | 2 | No  | 95  | 50 | 25 | - | - |
| 65  | -  | 2 | No  | 95  | 95 | 20 | - | - |
| 66  | 15 | 3 | No  | 95  | 2  | 40 | - | - |
| 67  | -  | 3 | No  | 70  | 90 | 20 | - | - |
| 68  | 19 | 2 | No  | 80  | 80 | 70 | - | - |
| 69  | 22 | 2 | -   | 90  | 10 | 35 | - | - |
| 70  | -  | 3 | No  | 90  | 50 | 30 | - | - |
| 71  | 23 | - | Yes | 70  | 0  | 25 | - | - |
| 72  | -  | 3 | -   | 80  | 70 | 60 | - | - |
| 73  | 21 | 1 | No  | 90  | 90 | 25 | - | - |
| 74  | -  | 2 | No  | 95  | 95 | 20 | - | - |
| 75  | -  | 3 | Yes | 75  | 65 | 60 | - | - |
| 76  | 7  | 3 | -   | 40  | 80 | 40 | - | - |
| 77  | -  | 3 | Yes | 40  | 2  | 40 | - | - |
| 78  | 2  | 3 | No  | 95  | 95 | 30 | - | - |
| 79  | -  | 3 | Yes | 70  | 5  | 30 | - | - |
| 80  | -  | 2 | No  | 90  | 0  | 40 | - | - |
| 81  | 28 | 2 | No  | 70  | 90 | 25 | - | - |
| 82  | -  | 1 | -   | 95  | 80 | 55 | - | - |
| 83  | -  | 2 | Yes | 95  | 95 | 25 | - | - |
| 84  | -  | 3 | Yes | 95  | 5  | 50 | - | - |
| 85  | 13 | 2 | No  | 90  | 95 | 20 | - | - |
| 86  | 41 | 2 | Yes | 80  | 60 | 30 | - | - |
| 87  | -  | 3 | No  | 30  | 60 | 80 | - | - |
| 88  | -  | 2 | Yes | 95  | 30 | 30 | - | - |
| 89  | -  | 2 | No  | 100 | 0  | 20 | - | - |
| 90  | 13 | 2 | No  | 90  | 95 | 25 | - | - |
| 91  | -  | 2 | Yes | 70  | 5  | 30 | - | - |
| 92  | -  | 3 | No  | 65  | 70 | 55 | - | - |
| 93  | -  | 1 | No  | 95  | 45 | 50 | - | - |
| 94  | -  | 2 | No  | 95  | 95 | 20 | - | - |
| 95  | -  | 2 | No  | 95  | 90 | 20 | - | - |
| 96  | -  | - | No  | 90  | 60 | 40 | - | - |
| 97  | 23 | 3 | No  | 95  | 10 | 20 | - | - |
| 98  | -  | 3 | No  | 90  | 95 | 20 | - | - |
| 99  | -  | 2 | No  | 90  | 95 | 20 | - | - |
| 100 | 9  | 2 | -   | 60  | 60 | 30 | - | - |
| 101 | -  | 3 | No  | 95  | 1  | 30 | - | - |
| 102 | 18 | 3 | No  | 80  | 25 | 70 | - | - |
| 103 | -  | 2 | No  | 95  | 95 | 20 | - | - |
| 104 | -  | 3 | No  | 80  | 70 | 45 | - | - |
| 105 | 22 | 3 | Yes | 80  | 80 | 25 | - | - |

|     |    |   |     |     |     |    |   |   |
|-----|----|---|-----|-----|-----|----|---|---|
| 106 | 14 | 3 | No  | 50  | 60  | 50 | - | - |
| 107 | -  | 2 | Yes | 70  | 20  | 20 | - | - |
| 108 | -  | 1 | No  | 95  | 95  | 20 | - | - |
| 109 | -  | 2 | No  | 90  | 70  | 25 | - | - |
| 110 | -  | 2 | Yes | 95  | 5   | 30 | - | - |
| 111 | 3  | 3 | No  | 80  | 5   | 25 | - | - |
| 112 | 75 | 2 | Yes | 95  | 25  | 20 | - | - |
| 113 | -  | 2 | No  | 95  | 60  | 20 | - | - |
| 114 | 34 | 3 | Yes | 90  | 90  | 50 | - | - |
| 115 | 26 | 2 | Yes | 90  | 60  | 65 | - | - |
| 116 | 13 | 2 | Yes | 95  | 95  | 40 | - | - |
| 117 | 15 | 3 | Yes | 80  | 75  | 20 | - | - |
| 118 | -  | 3 | Yes | 95  | 90  | 85 | - | - |
| 119 | 17 | 3 | No  | 95  | 80  | 60 | - | - |
| 120 | -  | 2 | Yes | 90  | 80  | 30 | - | - |
| 121 | 32 | 2 | No  | 95  | 95  | 30 | - | - |
| 122 | 11 | 3 | Yes | 90  | 80  | 25 | - | - |
| 123 | 15 | - | Yes | 80  | 65  | 30 | - | - |
| 124 | 18 | 3 | No  | 80  | 80  | 40 | - | - |
| 125 | 19 | 3 | Yes | 95  | 50  | 70 | - | - |
| 126 | -  | 2 | Yes | 95  | 95  | 22 | - | - |
| 127 | 23 | 2 | No  | 95  | 85  | 20 | - | - |
| 128 | -  | 3 | Yes | 70  | 80  | 70 | - | - |
| 129 | -  | 2 | No  | 80  | 60  | 20 | - | - |
| 130 | 12 | 3 | No  | 95  | 90  | 25 | - | - |
| 131 | 18 | 3 | No  | 95  | 5   | 40 | - | - |
| 132 | 2  | 2 | No  | 95  | 15  | 20 | - | - |
| 133 | 11 | 2 | Yes | 80  | 70  | 40 | - | - |
| 134 | 11 | 3 | No  | 70  | 5   | 30 | - | - |
| 135 | 12 | 2 | -   | 95  | 80  | 20 | - | - |
| 136 | 35 | 3 | No  | 100 | 40  | 50 | - | - |
| 137 | 11 | 2 | -   | 95  | 40  | 25 | - | - |
| 138 | 22 | 3 | No  | 70  | 70  | 20 | - | - |
| 139 | 1  | 2 | No  | 90  | 90  | 25 | - | - |
| 140 | 15 | 2 | No  | 95  | 65  | 25 | - | - |
| 141 | -  | 3 | No  | 90  | 90  | 60 | - | - |
| 142 | 25 | 2 | -   | 98  | 95  | 25 | - | - |
| 143 | 11 | 2 | No  | 95  | 95  | 25 | - | - |
| 144 | 7  | 2 | No  | 95  | 100 | 30 | - | - |
| 145 | 12 | 2 | No  | 95  | 90  | 35 | - | - |
| 146 | 32 | 3 | No  | 80  | 50  | 25 | - | - |
| 147 | 15 | 3 | -   | 70  | 40  | 30 | - | - |
| 148 | 1  | 2 | -   | 95  | 95  | 25 | - | - |
| 149 | 6  | 2 | No  | 90  | 50  | 20 | - | - |
| 150 | 6  | 3 | No  | 90  | 70  | 25 | - | - |

*LVI* lymphovascular invasion, *ER* estrogen receptor, *PgR* progesterone receptor, *HER2* human epidermal growth factor receptor 2, *LN* lymph node

**Supplementary Table 3:** Detailed list of the investigated genes

| <b>Gene</b>                    | <b>Gene Name</b>                                                       | <b>Localization</b> |
|--------------------------------|------------------------------------------------------------------------|---------------------|
| <i>AHNAK</i>                   | AHNAK nucleoprotein                                                    | 11q12.2             |
| <i>AXL</i>                     | AXL receptor tyrosine kinase                                           | 19q13.1             |
| <i>BMP1</i>                    | Bone Morphogenetic Protein 1                                           | 8p21.3              |
| <i>CALD1</i>                   | Caldesmon 1                                                            | 7q33                |
| <i>CD163</i>                   | CD163 molecule                                                         | 12p13.3             |
| <i>CD28</i>                    | CD28 molecule                                                          | 2q33                |
| <i>CD4</i>                     | CD4 molecule                                                           | 12p13.31            |
| <i>CDH1</i>                    | Cadherin type 1                                                        | 16q22.1             |
| <i>CDH2</i>                    | Cadherin 2, type 1, N-cadherin                                         | 18q11.2             |
| <i>COL1A2</i>                  | Collagen type 1, alpha 2                                               | 17q21.33            |
| <i>CSF1</i>                    | Colony Stimulating Factor 1                                            | 1p13.3              |
| <i>CXCR4</i>                   | Chemokine (C-X-C motif) Receptor 4                                     | 2q21                |
| <i>ERBB2</i>                   | Erb-b2 receptor tyrosine kinase 2                                      | 17q12               |
| <i>ESR1</i>                    | Estrogen Receptor 1                                                    | 6q25.1              |
| <i>FGF1</i>                    | Fibroblast growth factor 1                                             | 5q31                |
| <i>FOXC2</i>                   | Forkhead box C2                                                        | 16q24.1             |
| <i>GSC</i>                     | Goosecoid homeobox                                                     | 14q32.1             |
| <i>IGF1R</i>                   | Insulin-like Growth Factor 1 Receptor                                  | 12q23.2             |
| <i>IGFBP4</i>                  | Insulin-like Growth Factor Binding Protein 4                           | 17q21.2             |
| <i>IL10</i>                    | Interleukin 10                                                         | 1q31-q32            |
| <i>IL2</i>                     | Interleukin 2                                                          | 4q26-q27            |
| <i>ITGAV</i>                   | Integrin Alpha V                                                       | 2q31-q32            |
| <i>LAG3</i>                    | Lymphocyte Activation Gene 3                                           | 12p13.32            |
| <i>MKI67</i>                   | Marker of proliferation Ki-67                                          | 10q26.2             |
| <i>MRC1</i>                    | Mannose Receptor type C 1                                              | 10p12.33            |
| <i>OSM</i>                     | Oncostatin M                                                           | 22q12.2             |
| <i>PGR</i>                     | Progesterone Receptor                                                  | 11q22-q23           |
| <i>SNAI1</i>                   | Snail family zinc finger 1                                             | 20q13.2             |
| <i>SNAI2</i>                   | Snail family zinc finger 2                                             | 8q11                |
| <i>SNAI3</i>                   | Snail family zinc finger 3                                             | 16q24.3             |
| <i>SOX10</i>                   | SRY box 10                                                             | 22q13.1             |
| <i>SPARC</i>                   | Secreted Protein, Acidic, Cysteine-Rich (osteonectin)                  | 5q31.3-q32          |
| <i>STEAP1</i>                  | Six Transmembrane Epithelial Antigen of the Prostate 1                 | 7q21                |
| <i>TGF-<math>\beta</math>1</i> | Transforming Growth Factor Beta 1                                      | 19q13.1             |
| <i>TGF-<math>\beta</math>2</i> | Transforming Growth Factor Beta 2                                      | 1q41                |
| <i>TIMP1</i>                   | TIMP metalloproteinase inhibitor 1                                     | Xp11.3-p11.23       |
| <i>TMEFF1</i>                  | Transmembrane protein with EGF-like and two follistatin-like domains 1 | 9q31                |
| <i>TWIST1</i>                  | Twist family bHLH transcription factor 1                               | 7p21.2              |
| <i>VCAN</i>                    | Versican                                                               | 5q14.3              |
| <i>VIM</i>                     | Vimentin                                                               | 10p13               |
| <i>WNT5A</i>                   | Wingless-type MMTV integration site family member 5A                   | 3p21-p14            |
| <i>ZEB1</i>                    | Zinc finger E-box Binding homeobox 1                                   | 10p11.2             |

**Supplementary Table 4:** Clinical and pathological features of patients enclosed in the Metabric cohort

| <b>Characteristics</b>           | <b>Luminal B</b>   |
|----------------------------------|--------------------|
| <b>Patients (n)</b>              | 315                |
| <b>Mean age: years (IQR)</b>     | 64.5 (56.4 – 74.1) |
| <b>Mean tumor size: mm (IQR)</b> | 25.0 (18.0 – 31.0) |
| <b>Lymph node status</b>         |                    |
| Negative (%)                     | 160 (50.8)         |
| Positive (%)                     | 155 (49.2)         |
| <b>Tumor grade</b>               |                    |
| G1-2 (%)                         | 125 (39.7)         |
| G3 (%)                           | 181 (57.5)         |
| Unknown (%)                      | 9 (2.8)            |
| <b>Tumor stage</b>               |                    |
| I-II (%)                         | 254 (80.6)         |
| III-IV (%)                       | 28 (8.9)           |
| Unknown (%)                      | 33 (10.5)          |

*IQR* interquartile range, *N* number
